# Supplementary material
Source: PubMed Central journal article supplement (PMC4177106)
Supplement: NIHMS535103-supplement-1.pdf [file NIHMS535103-supplement-1.pdf]

## Supplemental Table1: Murine HLH Disease Severity Scoring System

In order to more accurately measure disease severity in LCMV-infected mice, we have developed a clinical scoring system ranging from 0 (asymptomatic) to 15 based on weight loss (0-3), stance (0-3), coordination (0-3), skin tenting (0-2), conjunctivitis (0-2), ascites (0-2), and mortality (cumulative score 12). LCMV-infected prf-/- mice experience exaggerated symptomatology over time yielding high clinical scores before becoming moribund, defined as a clinical score 11 or greater. In contrast, LCMV-infected wild-type C57BL/6 mice (WT) experience mild weight loss and clinical symptoms, generally recovering by day 15 of illness.

|                          | SCORE | Consistent Findings   |
|--------------------------|-------|-----------------------|
| <b>Weight loss (0-3)</b> | 0     | < 5% weight loss      |
|                          | 1     | 5% - 10% weight loss  |
|                          | 2     | 10% - 15% weight loss |
|                          | 3     | >15% weight loss      |

|                     |   |                                        |
|---------------------|---|----------------------------------------|
| <b>Stance (0-3)</b> | 0 | Smooth, well groomed fur               |
|                     | 1 | Ruffled, unkempt fur                   |
|                     | 2 | Hunched back, unable to straighten out |
|                     | 3 | Huddled and shaking; minimal activity  |

**Coordination (0-3)** Assessed by twirl test (twirl mouse 3X over cage and gently drop mouse in center of cage). Sometimes it is necessary to repeat or make sure there is at least 1 companion mouse in the “drop in” cage to provide a visual cue. Should not allow more than 2 companion mice in “drop in” cage to minimize crowding effect.

|   |                                                                                               |
|---|-----------------------------------------------------------------------------------------------|
| 0 | Moves quickly to corner without direction change                                              |
| 1 | Hesitation, but goes to corner without direction change                                       |
| 2 | May hesitate; Goes to a corner within 5 seconds, but changes direction on the way             |
| 3 | Does not make it to a corner within 5 seconds; usually huddled, shaking or walking in circles |

|                           |                                                                             |                                                          |
|---------------------------|-----------------------------------------------------------------------------|----------------------------------------------------------|
| <b>Skin tenting (0-2)</b> | Assessed by pinch test (pinch mouse skin on chest and observe skin tenting) |                                                          |
|                           | 0                                                                           | None; skin snaps back into place                         |
|                           | 1                                                                           | Skin initially tents, but returns to normal by 3 seconds |
|                           | 2                                                                           | Skin remains tented after 3 seconds                      |

|                             |   |                                             |
|-----------------------------|---|---------------------------------------------|
| <b>Conjunctivitis (0-2)</b> | 0 | None                                        |
|                             | 1 | Crusting of 1 eye                           |
|                             | 2 | Crusting of 2 eyes <b>(Sacrifice mouse)</b> |

|                      |   |                                                 |
|----------------------|---|-------------------------------------------------|
| <b>Ascites (0-2)</b> | 0 | None; abdomen remains depressed after palpation |
|                      | 1 | Full abdomen that <u>may</u> represent ascites  |
|                      | 2 | Definitive and/or massive ascites               |

### Moribund (cumulative score 11)

Mice achieving a cumulative score of 11 on 2 sequential daily assessments are considered moribund and **sacrificed**. Any mouse unable to move adequately so that it cannot eat or drink, or with weight loss >20% is considered moribund and is sacrificed without a second assessment.

### Mortality (cumulative score 12)

Dead mice are assigned a cumulative score of 12 for analysis purposes.

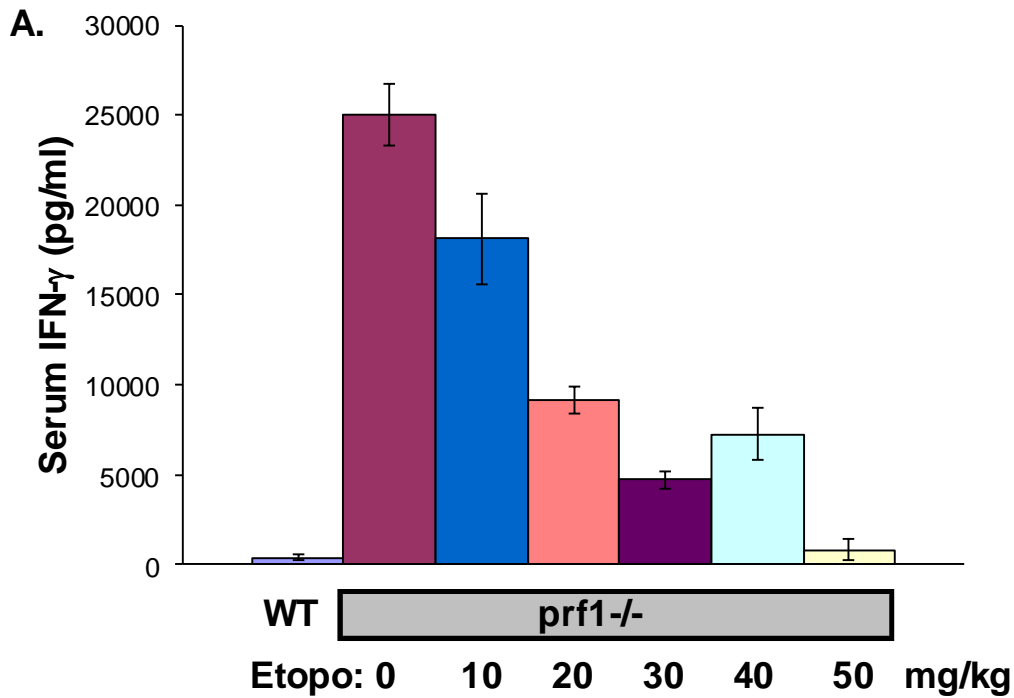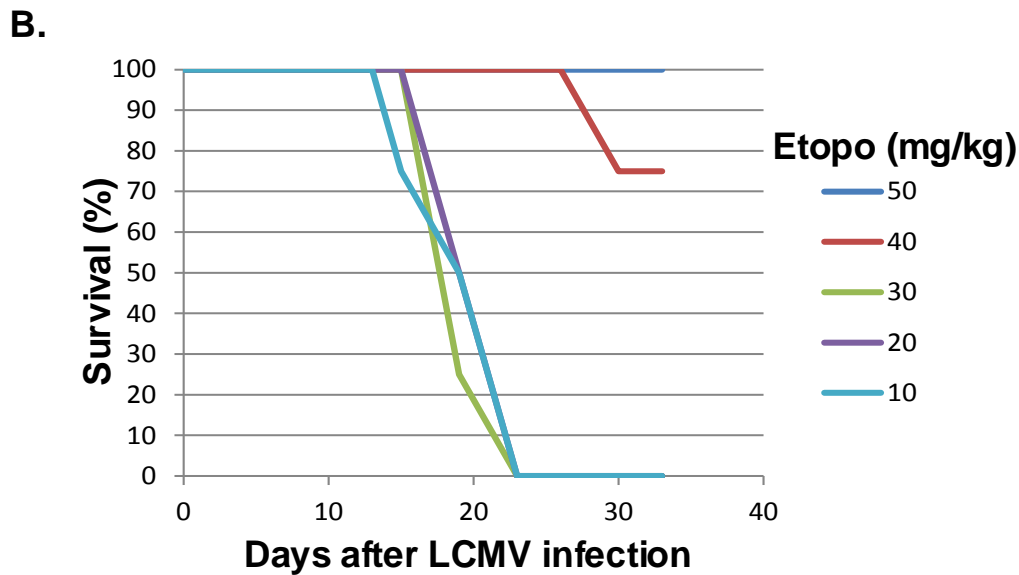

**Supplemental Figure 1. Dose:response relationship for etoposide as a therapeutic agent in murine HLH. A.** *Prf*<sup>-/-</sup> mice were treated on day 5 of LCMV infection with etoposide at the indicated doses. Day 8 serum IFN- $\gamma$  levels were determined by ELISA. WT mice are shown for comparison. **B.** Survival in this cohort was determined.

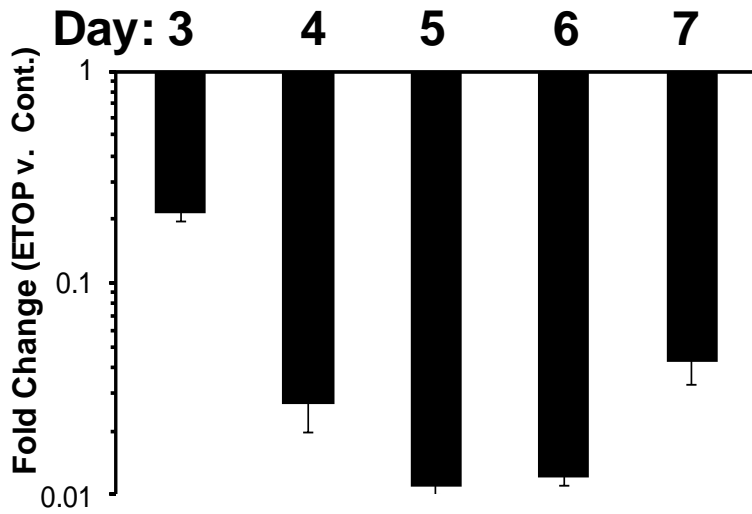

**Supplemental Figure 2. Timing and efficacy of etoposide for ablation of activated T cells.** LCMV-infected *prf*<sup>-/-</sup> mice were treated with etoposide (50mg/kg ip) at the indicated day post infection. LCMV-specific CD8<sup>+</sup> T cells (D<sup>b</sup>-GP33 tetramer<sup>+</sup>) were enumerated in the spleen on day 8 after infection. The fold change compared to carrier treated controls is plotted.
